# Supplementary material for: Process Simulation and Techno-Economic Analysis of Large-Scale Bioproduction of Sweet Protein Thaumatin II
Source: PubMed Central journal article supplement (PMC8069865; doi:10.3390/foods10040838), 2021-04-12
Supplement: foods-10-00838-s001.pdf [file foods-10-00838-s001.pdf]

# Process Simulation and Techno-Economic Analysis of Large-Scale Bioproduction of Sweet Protein Thaumatin II

Kirolos D. Kelada<sup>1</sup>, Daniel Tusé<sup>2</sup>, Yuri Gleba<sup>3</sup>, Karen A. McDonald<sup>1,4</sup> and Somen Nandi<sup>1,4\*</sup>

<sup>1</sup>Department of Chemical Engineering, University of California, Davis, CA, USA; <sup>2</sup>DT/Consulting Group, Sacramento, CA, USA; <sup>3</sup>Nomad Bioscience GmbH, Halle, Germany; <sup>4</sup>Global HealthShare® Initiative, University of California, Davis, CA, USA

\* Correspondence: author. Email: snandi@ucdavis.edu; Address: 1035 Academic Surge, 1 Shields Avenue, Davis, CA 95616

## Transgenic Facilities Economic Inputs

The facilities' economic evaluation is based on the US dollar value in 2020. A 4% inflation rate is used to adjust for equipment purchase prices from previous years. Field growth economic variables were obtained from various sources. Fertilizer quantity and cost were obtained from a cost estimation spreadsheet developed University of Kentucky department of Agricultural Economics (UKAE) [1]. The quantity was estimated by linear extrapolation based on 120 days growth and adjusted from the 42 days growth period in this model. Field irrigation was estimated from the Food and Agriculture Organization of the United Nations water requirement for tobacco [2]. For land purchase prices, farm real estate average value per acre in Florida was estimated based on the USDA land values 2018 summary report [3]. Drip irrigation costs were obtained from [4]. Fuel, lubrication, and repair costs for tractors and other field equipment were obtained from the 2015 UC ANR field cost study [5] and were adjusted based on the average annual spinach producer price indices obtained from the Federal Reserve Bank of St. Louis [6]. Indoor cost variables were adapted from [7]. Downstream processing economic values were obtained from [8], [7], SuperPro Designer default values, and WPK. Startup and validation costs were estimated as 5% of direct fixed capital (DFC). Working capital was estimated to cover expenses for 30 days of operation.

## Transient Facility Economic Inputs

The facility's economic evaluation is based on the US dollar value in 2020. A 4% inflation rate is used to adjust for equipment purchase prices from previous years. Spinach field growth economic parameters were adjusted based on the average annual spinach producer price indices obtained from the Federal Reserve Bank of St. Louis (FRED Federal Reserve Bank of St. Louis, 2020). VPL's economic parameters were adapted from [8] and equipment purchase prices were adjusted according to the following equation:

$$C = C_0 \left( \frac{Q}{Q_0} \right)^{0.6}$$

where  $C$  is the equipment cost,  $C_0$  is the base cost,  $Q$  is the capacity variable,  $Q_0$  is the base capacity. Other unit operation equipment costs were estimated from the built-in SuperPro Designer cost models.

Farm real estate average value per acre in California was estimated based on the USDA land values 2018 summary report (USDA, 2018). Drip irrigation costs were obtained from Simonne et al. (2008). Fuel, lubrication, and repair costs for tractors and other field equipment were obtained from the 2015 UC ANR cost study [5]. Downstream processing economic values were obtained from Nandi et al. (2016), McNulty et al. (2019), SuperPro Designer default values, and WPK.

**Table 1.** Transgenic thaumatin production facilities base case design parameters and assumptions; FW, fresh weight; WPK, working process knowledge; Calc, calculation; MT, metric ton.

| <i>Parameter</i>                                                  | <i>Value</i> | <i>Unit</i>          | <i>Reference</i>                                   |
|-------------------------------------------------------------------|--------------|----------------------|----------------------------------------------------|
| <b>Upstream facility (field), with downstream chromatography</b>  |              |                      |                                                    |
| <i>Production level</i>                                           | 50           | MT thaumatin/year    | Assumption                                         |
| <i>Number of batches</i>                                          | 157          | batches/year         | Calc                                               |
| <i>Batch duration</i>                                             | 45.3         | days                 | Calc                                               |
| <i>Recipe cycle time</i>                                          | 2            | days                 | Calc                                               |
| <i>Growth time (seeding to induction)</i>                         | 35           | days                 | WPK                                                |
| <i>Incubation time (induction to harvest)</i>                     | 7            | days                 | WPK                                                |
| <i>Land turnaround duration</i>                                   | 3            | days                 | WPK                                                |
| <i>Thaumatin expression level</i>                                 | 1.5          | g/kg FW              | WPK                                                |
| <i>Plant density</i>                                              | 130,000      | plants/acre          | Assumption<br>(based on 3 plants/ft <sup>2</sup> ) |
| <i>N. tabacum aerial biomass at harvest</i>                       | 100          | g/plant              | [9]                                                |
| <i>Germination efficiency</i>                                     | 90           | %                    | Assumption                                         |
| <i>Acreage per batch</i>                                          | 24.5         | acres                | Calc                                               |
| <i>Number of plots</i>                                            | 22           | plots/total field    | Calc                                               |
| <i>Total field acreage (footprint)</i>                            | 538          | acres                | Calc                                               |
| <i>Total annual cultivated acreage</i>                            | 3,850        | acres/yr             | Calc                                               |
| <i>Location</i>                                                   | Florida, USA |                      | Assumption                                         |
| <b>Upstream facility (indoor), with downstream chromatography</b> |              |                      |                                                    |
| <i>Production level</i>                                           | 50           | MT thaumatin/yr      |                                                    |
| <i>Number of batches</i>                                          | 157          | batches/yr           | Calc                                               |
| <i>Batch duration</i>                                             | 42.6         | days                 | Calc                                               |
| <i>Recipe cycle time</i>                                          | 2            | days                 | Calc                                               |
| <i>Growth time (seeding-induction)</i>                            | 35           | days                 | [7]                                                |
| <i>Incubation time (induction-harvest)</i>                        | 7            | days                 | [7]                                                |
| <i>Thaumatin expression level</i>                                 | 1.5          | g/kg FW              | WPK                                                |
| <i>N. benthamiana aerial biomass at harvest</i>                   | 15           | g/plant              | [7]                                                |
| <i>Plants per batch</i>                                           | 21,200,000   | plants/batch         | Calc                                               |
| <i>Germination efficiency</i>                                     | 95           | %                    | Assumption                                         |
| <i>Plants per tray</i>                                            | 94           | Plants tray          | [7]                                                |
| <i>Tray area</i>                                                  | 0.15         | m <sup>2</sup> /tray | [7]                                                |
| <i>Growth space design</i>                                        | 10           | layers               | Assumption                                         |
| <i>Growth space utilization</i>                                   | 90           | %                    | Assumption                                         |
| <i>Facility footprint</i>                                         | 83,000       | m <sup>2</sup>       | Calc                                               |
| <b>Downstream processing facility, with chromatography</b>        |              |                      |                                                    |
| <i>Batch duration</i>                                             | 54.5         | hours                | Calc                                               |
| <i>Downstream recovery</i>                                        | 66.8         | %                    | Assumption                                         |
| <i>Final product purity</i>                                       | 98.0         | %                    | Assumption                                         |
| <b>Downstream processing facility, without chromatography</b>     |              |                      |                                                    |
| <i>Batch duration</i>                                             | 38.4         | hours                | Calc                                               |
| <i>Downstream recovery</i>                                        | 80           | %                    | Assumption                                         |
| <i>Final product purity</i>                                       | 74.8         | %                    | Assumption                                         |

**Table 2.** Downstream processing losses breakdown per unit operation; P&F, plate and frame filtration; DSP, downstream processing; UF/DF, ultrafiltration/diafiltration; Chrom, chromatography.

| <i>DSP facility without chromatography</i>          |                    |                  |                  |                  |              |                          |               |
|-----------------------------------------------------|--------------------|------------------|------------------|------------------|--------------|--------------------------|---------------|
| <i>Step</i>                                         | <i>Screw Press</i> | <i>P&amp;F 1</i> | <i>P&amp;F 2</i> | <i>P&amp;F 3</i> | <i>UF/DF</i> | <i>Chrom and UF/DF 2</i> | <i>Drying</i> |
| <i>Loss (% of initial thaumatin)</i>                | 3.0                | 5.0              | 5.0              | 1.5              | 5.0          | -                        | 0.5           |
| <i>Cumulative recovery (% of initial thaumatin)</i> | 97.0               | 92.0             | 87.0             | 85.5             | 80.5         | -                        | 80.0          |
| <i>Start (kg/batch)</i>                             | 398                | 386              | 366              | 346              | 340          | -                        | 320           |
| <i>End (kg/batch)</i>                               | 386                | 366              | 346              | 340              | 320          | -                        | 319           |
| <i>% loss per unit</i>                              | 3.0                | 5.2              | 5.4              | 1.7              | 5.8          | -                        | 0.6           |
| <i>DSP facility with chromatography</i>             |                    |                  |                  |                  |              |                          |               |
| <i>Step</i>                                         | <i>Screw Press</i> | <i>P&amp;F 1</i> | <i>P&amp;F 2</i> | <i>P&amp;F 3</i> | <i>UF/DF</i> | <i>Chrom and UF/DF 2</i> | <i>Drying</i> |
| <i>Loss (% of initial thaumatin)</i>                | 3.0                | 5.0              | 5.0              | 1.5              | 5.0          | 13.2                     | 0.5           |
| <i>Cumulative recovery (% of initial thaumatin)</i> | 97.0               | 92.0             | 87.0             | 85.5             | 80.5         | 67.3                     | 66.8          |
| <i>Start (kg/batch)</i>                             | 477                | 463              | 439              | 415              | 408          | 384                      | 320           |
| <i>End (kg/batch)</i>                               | 463                | 439              | 415              | 408              | 384          | 320                      | 319           |
| <i>% loss per unit</i>                              | 3.0                | 5.2              | 5.4              | 1.7              | 5.8          | 17                       | 0.6           |

**Table 3.** Transient production of thaumatin in spinach base case parameters and assumptions FW, fresh weight; WPK, working process knowledge; Calc, calculation; MT, metric ton.

| <i>Parameter</i>                                              | <i>Value</i>    | <i>Unit</i>       | <i>Reference</i> |
|---------------------------------------------------------------|-----------------|-------------------|------------------|
| <i>Overall facility</i>                                       |                 |                   |                  |
| <i>Production level</i>                                       | 50              | MT thaumatin/yr   |                  |
| <i>Number of batches</i>                                      | 153             | batches/yr        | Calc             |
| <i>Batch duration</i>                                         | 68              | days              | Calc             |
| <i>Recipe cycle time</i>                                      | 1.94            | days              | Calc             |
| <i>Location</i>                                               | California, USA |                   |                  |
| <i>Spinach field growth</i>                                   |                 |                   |                  |
| <i>Growth time (seeding-spraying)</i>                         | 45              | days              | [10]             |
| <i>Incubation time (spraying-harvest)</i>                     | 15              | days              | WPK              |
| <i>Thaumatin expression level</i>                             | 1               | g/kg FW           | WPK              |
| <i>Field plant density</i>                                    | 174,240         | plants/acre       | Assumption       |
| <i>Spinach yield</i>                                          | 15,240          | kg FW/acre        | [10], WPK        |
| <i>Seed quantity</i>                                          | 1.25 million    | seeds/acre        | [10]             |
|                                                               | 31.3            | lbs/acre          | [5]              |
| <i>Acreage per batch</i>                                      | 22.6            | acres/batch       | Calc             |
| <i>Number of plots</i>                                        | 34              | plots/total field | Calc             |
| <i>Total field acreage (footprint)</i>                        | 767             | acres             | Calc             |
| <i>Total cultivated acreage (assuming no reusing of land)</i> | 3,450           | acres             | Calc             |
| <i>Viral particles production</i>                             |                 |                   |                  |
| <i>N. benthamiana growth time</i>                             | 35              | days              | [8]              |

|                                                                                                         |                  |             |            |
|---------------------------------------------------------------------------------------------------------|------------------|-------------|------------|
| <i>(seeding-infiltration)</i><br><i>N. benthamiana</i> incubation time<br><i>(infiltration-harvest)</i> | 7                | days        | [8]        |
| <i>Viral particles expression level</i>                                                                 | 1                | g/kg FW     | [11]       |
| <i>Viral particle concentration in spray suspension</i>                                                 | 10 <sup>14</sup> | particles/L | WPK        |
| <i>Viral particle molecular weight</i>                                                                  | 31,750           | kDa         | WPK        |
| <i>Spray volume requirement</i>                                                                         | 2                | mL/plant    | WPK        |
| <b><i>Downstream Processing</i></b>                                                                     |                  |             |            |
| <i>Downstream recovery</i>                                                                              | 95               | %           | WPK        |
| <i>Downstream Processing time</i>                                                                       | 30.2             | hrs/batch   | Calc       |
| <i>Final thaumatin purity</i>                                                                           | 94               | %           | Assumption |

**Table 4.** Transgenic production facilities DFC estimation parameters. DFC, direct fixed cost; PC, purchase cost; DC, direct cost; IC, indirect cost; OC, other costs.

|                           | <i>Upstream (Field)</i>              | <i>Upstream (Indoor)</i>            | <i>Downstream</i>                                                                                                                                                                                                                                                                                                                                                                                                                     |
|---------------------------|--------------------------------------|-------------------------------------|---------------------------------------------------------------------------------------------------------------------------------------------------------------------------------------------------------------------------------------------------------------------------------------------------------------------------------------------------------------------------------------------------------------------------------------|
| <i>Unlisted Equipment</i> | Seeding:<br>0.03 x PC*               | Seeding:<br>0.2 x PC                |                                                                                                                                                                                                                                                                                                                                                                                                                                       |
|                           | Plant Growth:<br>0.03 x PC           | Plant Growth:<br>0.2 x PC           |                                                                                                                                                                                                                                                                                                                                                                                                                                       |
|                           | Induction + Incubation:<br>0.03 x PC | Induction + Incubation:<br>0.2 x PC | Entire Facility:<br>0.2 x PC                                                                                                                                                                                                                                                                                                                                                                                                          |
|                           | Harvesting:<br>0.03 x PC             | Harvesting:<br>0.2 x PC             |                                                                                                                                                                                                                                                                                                                                                                                                                                       |
|                           | Transportation:<br>0.2 x PC          | Transportation:<br>0.2 x PC         |                                                                                                                                                                                                                                                                                                                                                                                                                                       |
| <i>Lang Factor</i>        | Seeding:<br>1.0 x PC                 | Seeding:<br>3.0 x PC                | Entire Facility:<br>DFC= DC+IC+OC<br>DC: **<br>Piping (A)= 0.35 x PC<br>Instrumentation (B)= 0.40 x PC<br>Insulation (C)= 0.03 x PC<br>Electrical Facilities (D)= 0.10 x PC<br>Buildings (E)= 0.45 x PC<br>Yard Improvement (F)= 0.15 x PC<br>Auxiliary Facilities (G)= 0.40 x PC<br>Unlisted Equipment Installation<br>Cost= 0.50 x Unlisted Equipment<br>purchase cost<br>Listed Equipment Installation<br>Cost: Equipment specific |
|                           | Plant Growth:<br>1.0 x PC            | Plant Growth:<br>3.0 x PC           |                                                                                                                                                                                                                                                                                                                                                                                                                                       |
|                           | Induction + Incubation:<br>1.0 x PC  | Induction + Incubation:<br>3.0 x PC | IC:<br>Engineering= 0.25 x DC<br>Construction= 0.25 x DC                                                                                                                                                                                                                                                                                                                                                                              |
|                           | Harvesting:<br>1.0 x PC              | Harvesting:<br>3.0 x PC             | OC:<br>Contractor's Fee= 0.05 x (DC + IC)<br>Contingency= 0.10 x (DC + IC)                                                                                                                                                                                                                                                                                                                                                            |
|                           | Transportation:<br>3.0 x PC          | Transportation:<br>3.0 x PC         |                                                                                                                                                                                                                                                                                                                                                                                                                                       |
|                           |                                      |                                     |                                                                                                                                                                                                                                                                                                                                                                                                                                       |
|                           |                                      |                                     |                                                                                                                                                                                                                                                                                                                                                                                                                                       |

\*Purchase Cost (PC) = Listed equipment purchase cost + unlisted equipment purchase cost

\*\* Direct Cost (DC)= PC + Installation +A + B + C + D + E + F + G.

**Table 5.** Transient production facility DFC estimation parameters. DFC, direct fixed cost; PC, purchase cost; DC, direct cost; IC, indirect cost; OC, other costs; VPL, virion production laboratory.

|                           | <i>VPL</i> | <i>Field Growth</i> | <i>Downstream</i>                                                                                                                                                                                                                                                                                                 |
|---------------------------|------------|---------------------|-------------------------------------------------------------------------------------------------------------------------------------------------------------------------------------------------------------------------------------------------------------------------------------------------------------------|
| <i>Unlisted Equipment</i> | 0.2 x PC   | 0.03 x PC           | Entire Facility:<br>0.2 x PC<br>Entire Facility:<br>DFC= DC+IC+OC<br>DC: **<br>Piping (A)= 0.35 x PC<br>Instrumentation (B)= 0.40 x PC<br>Insulation (C)= 0.03 x PC<br>Electrical Facilities (D)= 0.10 x PC<br>Buildings (E)= 0.45 x PC<br>Yard Improvement (F)= 0.15 x PC<br>Auxiliary Facilities (G)= 0.40 x PC |
| <i>Lang Factor</i>        | 3.0 x PC   | 1.0 x PC            | Unlisted Equipment Installation Cost= 0.50 x<br>Unlisted Equipment purchase cost<br>Listed Equipment Installation Cost: Equip-<br>ment specific<br>IC:<br>Engineering= 0.25 x DC<br>Construction= 0.25 x DC<br>OC:<br>Contractor's Fee= 0.05 x (DC + IC)<br>Contingency= 0.10 x (DC + IC)                         |

\*Purchase Cost (PC) = Listed equipment purchase cost + unlisted equipment purchase cost.

\*\* Direct Cost (DC)= PC + Installation +A + B + C + D + E + F + G.

**Table 6.** Working capital (WC) estimation parameters for all facilities. .

| <i>Parameter</i>                          | <i>Value</i> |
|-------------------------------------------|--------------|
| <i>Cover labor expenses for</i>           | 30 days      |
| <i>Cover raw materials expenses for</i>   | 30 days      |
| <i>Cover utilities expenses for</i>       | 30 days      |
| <i>Cover waste treatment expenses for</i> | 30 days      |
| <i>Startup and Validation</i>             | 5% of DFC    |



**Table 7.** Transgenic production facilities detailed annual labor cost. BLC, basic labor cost; TLC, total labor cost.

| <i>Facility</i>          | <i>Labor type</i>   | <i>BLC</i> | <i>TLC***</i> | <i>Direct Demand<br/>Hours per year</i> | <i>Total Demand<br/>Hours per year</i> |
|--------------------------|---------------------|------------|---------------|-----------------------------------------|----------------------------------------|
| <i>Upstream (field)</i>  | Upstream operator   | \$17/h     | \$39.10/h     | 30,647                                  | 40,863                                 |
| <i>Upstream (Indoor)</i> | Upstream operator   | \$20/h     | \$46/h        | 3,938                                   | 4,145                                  |
| <i>Downstream</i>        | Downstream operator | \$25/h     | \$57.50/h     | 21,663                                  | 28,884                                 |

\*\*\*TLC= BLC x (1 + Benefits (0.4) + Supervision (0.2) + Supplies (0.1) + Administration (0.6)).

**Table 8.** Transient production facility detailed annual labor cost. BLC, basic labor cost; TLC, total labor cost.

| <i>Facility Section</i> | <i>Labor type</i>   | <i>BLC</i> | <i>TLC***</i> | <i>Direct Demand Hours per year</i> | <i>Total Demand Hours per year</i> |
|-------------------------|---------------------|------------|---------------|-------------------------------------|------------------------------------|
| <i>VLP</i>              | Upstream operator   | \$20/h     | \$46/h        | 13,616                              | 18,155                             |
| <i>Field Growth</i>     | Field operator      | \$17/h     | \$39.10/h     | 36,620                              | 48,827                             |
| <i>Downstream</i>       | Downstream operator | \$25/h     | \$57.50/h     | 7,919                               | 10,559                             |

\*\*\*TLC= BLC x (1 + Benefits (0.4) + Supervision (0.2) + Supplies (0.1) + Administration (0.6)).

**Table 9.** Transgenic production facilities dependent costs estimation parameters.

| <b>Facility</b>   | <b>Raw Material</b> | <b>Unit Cost</b>                                                          |
|-------------------|---------------------|---------------------------------------------------------------------------|
| Upstream (field)  | Maintenance         | Included as consumables                                                   |
|                   | Depreciation        | Straight line over 10 years (5 % salvage value). Land is non-depreciable. |
|                   | Insurance           | 0.09% DFC                                                                 |
|                   | Local taxes         | 2.51% DFC                                                                 |
|                   | Factory expenses    | 0.12% DFC                                                                 |
| Upstream (indoor) | Maintenance         | Section dependent (0.10-0.40 % DFC)                                       |
|                   | Depreciation        | Straight line over 10 years (5 % salvage value)                           |
|                   | Insurance           | 1% DFC                                                                    |
|                   | Local taxes         | 2% DFC                                                                    |
|                   | Factory expenses    | 5% DFC                                                                    |
| Downstream        | Maintenance         | Equipment specific                                                        |
|                   | Depreciation        | Straight line over 20 years (5 % salvage value)                           |
|                   | Insurance           | 1% DFC                                                                    |
|                   | Local taxes         | 2% DFC                                                                    |
|                   | Factory expenses    | 5% DFC                                                                    |

**Table 10.** Transient production facilities dependent costs estimation parameters.

| <b>Facility</b> | <b>Raw Material</b> | <b>Unit Cost</b>                                                          |
|-----------------|---------------------|---------------------------------------------------------------------------|
| VPL             | Maintenance         | 0.40 % DFC                                                                |
|                 | Depreciation        | Straight line over 10 years (5 % salvage value). Land is non-depreciable. |
|                 | Insurance           | 0.09% DFC                                                                 |
|                 | Local taxes         | 2.51% DFC                                                                 |
|                 | Factory expenses    | 0.12% DFC                                                                 |
| Field growth    | Maintenance         | Included as consumables                                                   |
|                 | Depreciation        | Straight line over 10 years (5 % salvage value)                           |
|                 | Insurance           | 0.09% DFC                                                                 |
|                 | Local taxes         | 2.51% DFC                                                                 |
|                 | Factory expenses    | 0.12% DFC                                                                 |
| Downstream      | Maintenance         | Equipment specific                                                        |
|                 | Depreciation        | Straight line over 10 years (5 % salvage value)                           |
|                 | Insurance           | 1% DFC                                                                    |
|                 | Local taxes         | 2% DFC                                                                    |
|                 | Factory expenses    | 5% DFC                                                                    |

**Upstream Facility (Indoor)**

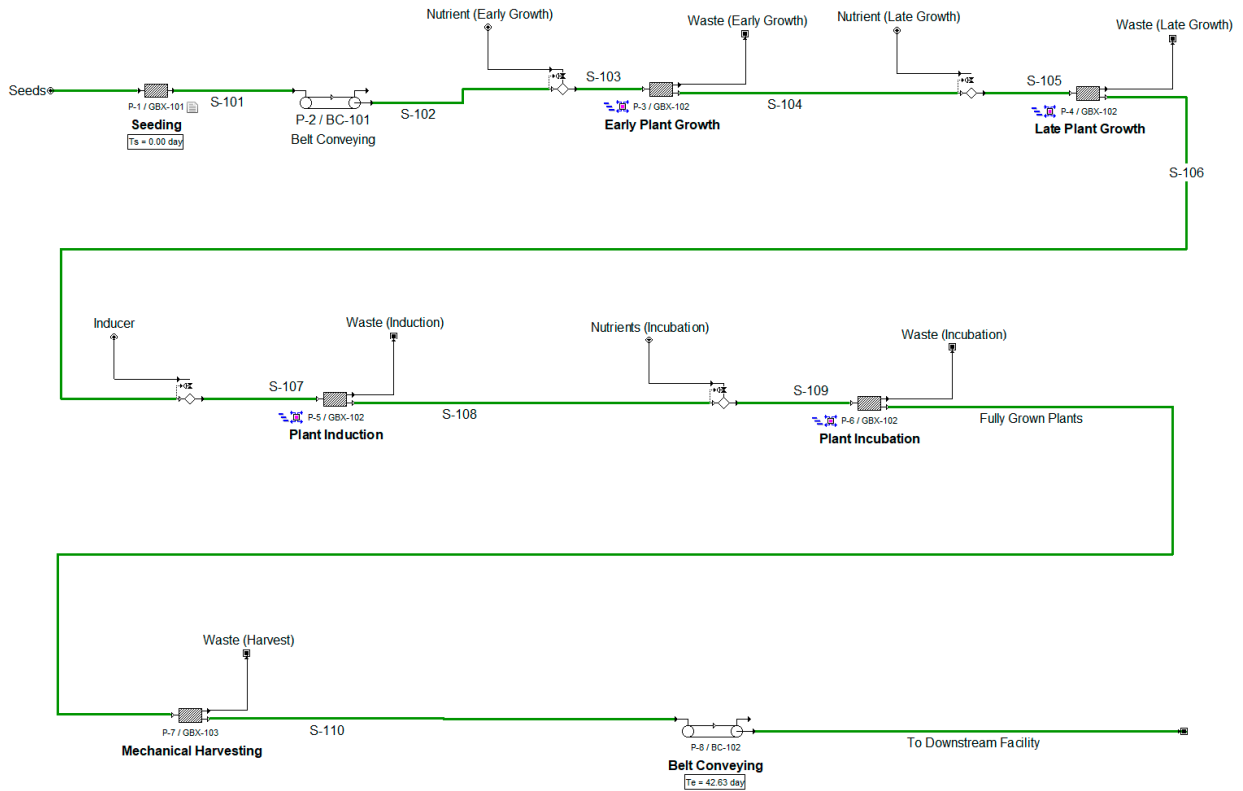

**Figure S1.** SuperPro Designer model flowsheet for vertical farming (indoor) upstream transgenic production facility

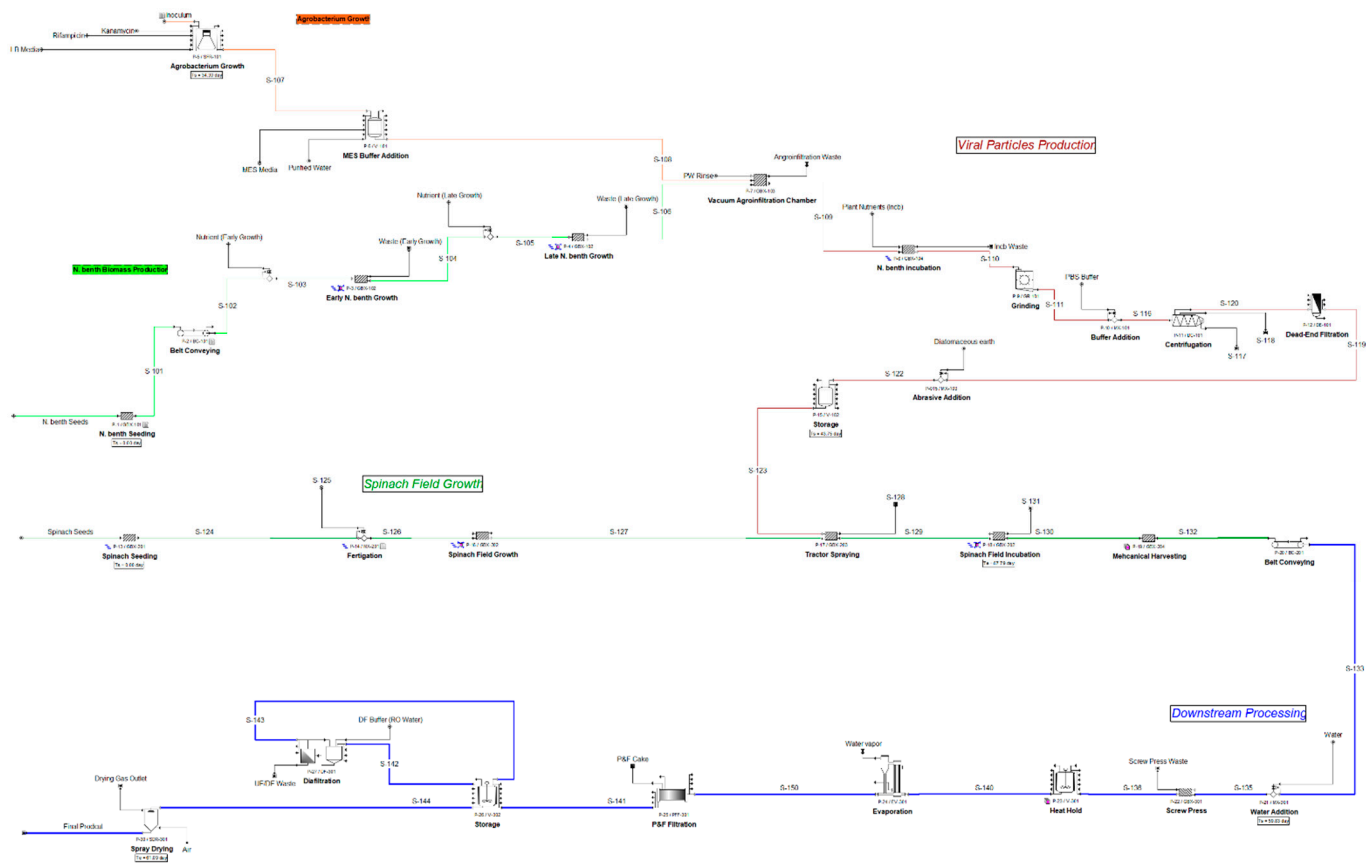

**Figure S2.** SuperPro Designer model flowsheet for thaumatin transient production in spinach. V-103: 73,000L (10 in parallel)

## Supplemental Materials References:

1. TN-KY Burley Tobacco Budget Burley Tobacco Budget 2018 Estimated Costs And Returns Available online: <http://www.uky.edu/Ag/AgriculturalEconomics/pubs/exttobbudget201857.xls> (accessed on Mar 15, 2019).
2. Food and Agriculture Organization of the United Nations Land & Water Tobacco Available online: <http://www.fao.org/land-water/databases-and-software/crop-information/tobacco/en/> (accessed on Mar 15, 2019).
3. United States Department of National Agriculture (USDA) Agricultural Statistics Service *Land Values 2018 Summary*; **2018**.
4. Simonne, E.; Hochmuth, R.; Breman, J.; Lamont, W.; Treadwell, D.; Gazula, A. Drip-irrigation systems for small conventional vegetable farms and organic vegetable farms. *University of Florida IFAS Extension* **2008**.
5. Smith, R.F.; Tumber, K.P. Sample Costs to Produce and Harvest Organic Spinach; **2015**.
6. FRED Federal Reserve Bank of St. Louis U.S. Bureau of Labor Statistics, Producer Price Index by Commodity for Farm Products: Spinach [WPU01130224] Available online: <https://fred.stlouisfed.org/series/WPU01130224> (accessed on Apr 23, 2020).
7. McNulty, M.J.; Gleba, Y.; Tusé, D.; Hahn-Löbmann, S.; Giritch, A.; Nandi, S.; McDonald, K.A. Techno-economic analysis of a plant-based platform for manufacturing antimicrobial proteins for food safety. *Biotechnology Progress* **2019**, *36*, e2896, doi:10.1002/btpr.2896.
8. Nandi, S.; Kwong, A.T.; Holtz, B.R.; Erwin, R.L.; Marcel, S.; McDonald, K.A. Techno-economic analysis of a transient plant-based platform for monoclonal antibody production. *mAbs* **2016**, *8*, 1456–1466, doi:10.1080/19420862.2016.1227901.
9. Knödler, M.; Rühl, C.; Emonts, J.; Buyel, J.F. Seasonal Weather Changes Affect the Yield and Quality of Recombinant Proteins Produced in Transgenic Tobacco Plants in a Greenhouse Setting. *Frontiers in Plant Science* **2019**, *10*, 1245, doi:10.3389/fpls.2019.01245.
10. Koike, S.T.; Cahn, M.; Cantwell, M.; Fennimore, S.; Lestrangle, M.; Natwick, E.; Smith, R.F.; Takele, E. Spinach production in California. **2011**.
11. Klimyuk, V.; Pogue, G.; Herz, S.; Butler, J.; Haydon, H. Production of Recombinant Antigens and Antibodies in *Nicotiana benthamiana* Using 'Magniffection' Technology: GMP-Compliant Facilities for Small- and Large-Scale Manufacturing. In *Plant Viral Vectors*; Palmer, K., Gleba, Y., Eds.; Springer Berlin Heidelberg: Berlin, Heidelberg, 2014; pp. 127–154 ISBN 978-3-642-40829-8.
